# Supplementary material for: Disinfectant Susceptibility of Third-Generation-Cephalosporin/Carbapenem-Resistant Gram-Negative Bacteria Isolated from the Oral Cavity of Residents of Long-Term-Care Facilities
Source: PubMed Central journal article supplement (PMC9888285; doi:10.1128/aem.01712-22), 2022-12-14
Supplement: aem.01712-22-s0008.pdf [file aem.01712-22-s0008.pdf]

**178 long-term care facility residents**

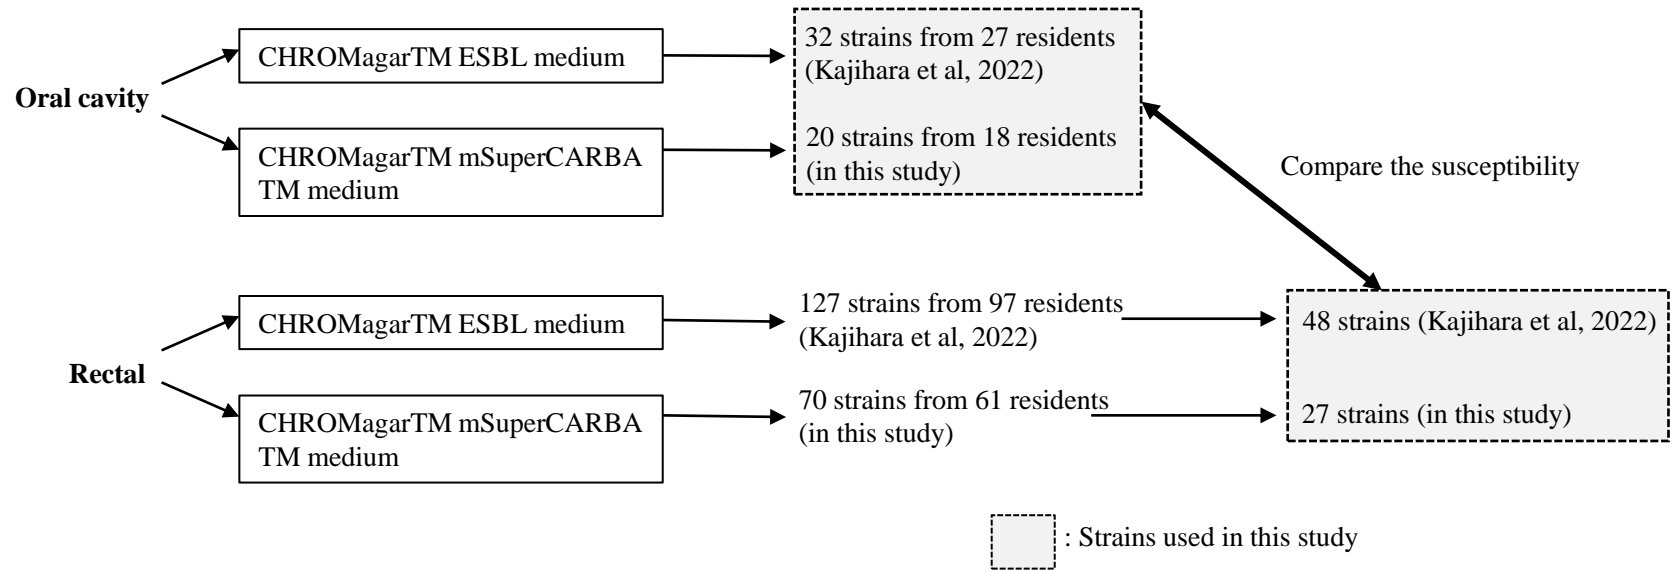

Supplemental Fig. 1. Isolates used in this study
